# Supplementary material for: Strong carrier localization in 3d transition metal oxynitride LaVO3−xNx epitaxial thin films
Source: Royal Society of Chemistry journal article supplement (doi:10.1039/c6tc04160d), 2017-01-01
Supplement: c6tc04160d1.pdf [file c6tc04160d1.pdf]

## Supplementary Information

### **Strong Carrier Localization in 3d Transition Metal Oxynitride $\text{LaVO}_{3-x}\text{N}_x$ Epitaxial Thin Films**

Masahito Sano<sup>1</sup>, Yasushi Hirose<sup>\*1,2</sup>, Shoichiro Nakao<sup>2</sup>, and Tetsuya Hasegawa<sup>1,2</sup>

1 Department of Chemistry, School of Science, The University of Tokyo, 7-3-1 Hongo, Bunkyo, Tokyo 113-0033, Japan

2 Kanagawa Academy of Science and Technology (KAST), 3-2-1 Sakado, Takatsu, Kawasaki 213-0012, Japan

\*E-mail: [hirose@chem.s.u-tokyo.ac.jp](mailto:hirose@chem.s.u-tokyo.ac.jp)

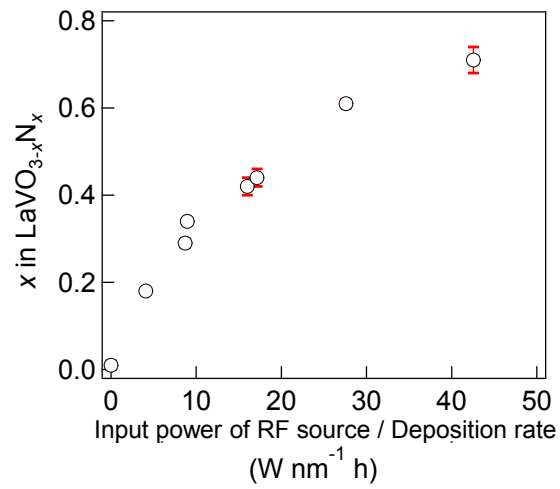

**Supplementary figure S1.** Nitrogen content  $x$  of the  $\text{LaVO}_{3-x}\text{N}_x$  thin films plotted against the ratio of the input power of the RF source to the deposition rate.  $x$  was systematically increased with an increase of the input power of the RF source/deposition rate ratio.

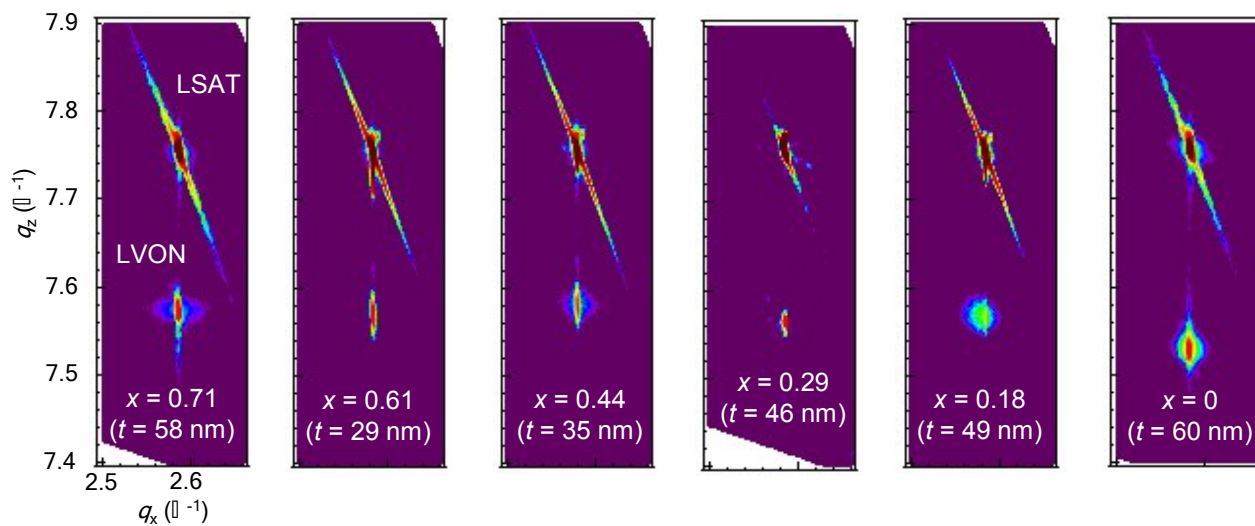

**Supplementary figure S2.** Reciprocal space maps around 103 diffraction of LaVO<sub>3-x</sub>N<sub>x</sub> thin films with various nitrogen amount grown on LSAT (001).

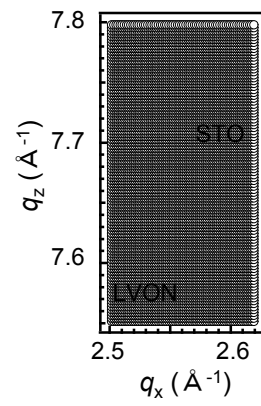

**Supplementary figure S3.** X-ray diffraction reciprocal space map around 103 diffraction of the  $\text{LaVO}_{2.29}\text{N}_{0.71}$  thin film grown on a  $\text{SrTiO}_3$  (001) substrate.

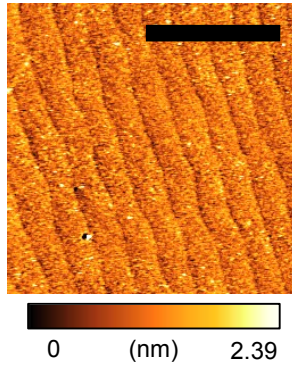

**Supplementary figure S4.** Typical AFM image of the  $\text{LaVO}_{2.29}\text{N}_{0.71}$  thin film grown on a  $\text{SrTiO}_3$  (001) substrate. Scale-bar denotes a length of  $1\ \mu\text{m}$ .
